# Supplementary material
Source: publisher figshare collection journal article supplement (https://tandf.figshare.com/articles/dataset/_/3145138)
Supplement: Supplementary file 1 [file 3]

**Table S1.** Sensitivity and specificity of SL $\alpha$  covariance model in detection of HBV.<sup>a</sup>

|                                       |   | True positive | True negative | False positive | False negative | Sensitivity | Specificity | Accuracy | Truncated hit | MER score <sup>b</sup> | Score threshold |
|---------------------------------------|---|---------------|---------------|----------------|----------------|-------------|-------------|----------|---------------|------------------------|-----------------|
| Training<br>(5-fold cross-validation) | 1 | 1034          | 5009          | 0              | 4              | 99.6        | 100         | 99.9     | 0             | 4                      | 28.7            |
|                                       | 2 | 1034          | 5622          | 0              | 4              | 99.6        | 100         | 99.9     | 0             | 4                      | 28.7            |
|                                       | 3 | 1033          | 6405          | 0              | 6              | 99.4        | 100         | 99.9     | 0             | 6                      | 29.0            |
|                                       | 4 | 1031          | 5724          | 0              | 9              | 99.1        | 100         | 99.9     | 0             | 9                      | 28.7            |
|                                       | 5 | 1035          | 5192          | 0              | 5              | 99.5        | 100         | 99.9     | 0             | 5                      | 28.7            |
| Testing                               |   | 1290          | 6969          | 0              | 10             | 99.2        | 100         | 99.9     | 0             | 10                     | 28.7            |

**Table S2.** Sensitivity and specificity of SL $\beta$  covariance model in detection of HBV.<sup>a</sup>

|                                       |   | True positive | True negative | False positive | False negative | Sensitivity | Specificity | Accuracy | Truncated hit | MER score <sup>b</sup> | Score threshold |
|---------------------------------------|---|---------------|---------------|----------------|----------------|-------------|-------------|----------|---------------|------------------------|-----------------|
| Training<br>(5-fold cross-validation) | 1 | 1033          | 5009          | 0              | 5              | 99.5        | 100         | 99.9     | 0             | 5                      | 33.1            |
|                                       | 2 | 1031          | 5622          | 0              | 7              | 99.3        | 100         | 99.9     | 0             | 7                      | 33.1            |
|                                       | 3 | 1028          | 6405          | 0              | 11             | 98.9        | 100         | 99.9     | 0             | 11                     | 33.2            |
|                                       | 4 | 1030          | 5724          | 0              | 10             | 99.0        | 100         | 99.9     | 0             | 10                     | 33.1            |
|                                       | 5 | 1032          | 5192          | 0              | 8              | 99.2        | 100         | 99.9     | 0             | 8                      | 33.1            |
| Testing                               |   | 1292          | 6969          | 0              | 8              | 99.4        | 100         | 99.9     | 0             | 8                      | 33.1            |

<sup>a</sup> Complete genomes of 6495 *Orthohepadnavirus* and 34921 other viruses (retrieved from GenBank viral division at 24 February 2016).

<sup>b</sup> Minimum error rate (MER) score: total number of false positive and false negative.<sup>1,2</sup>

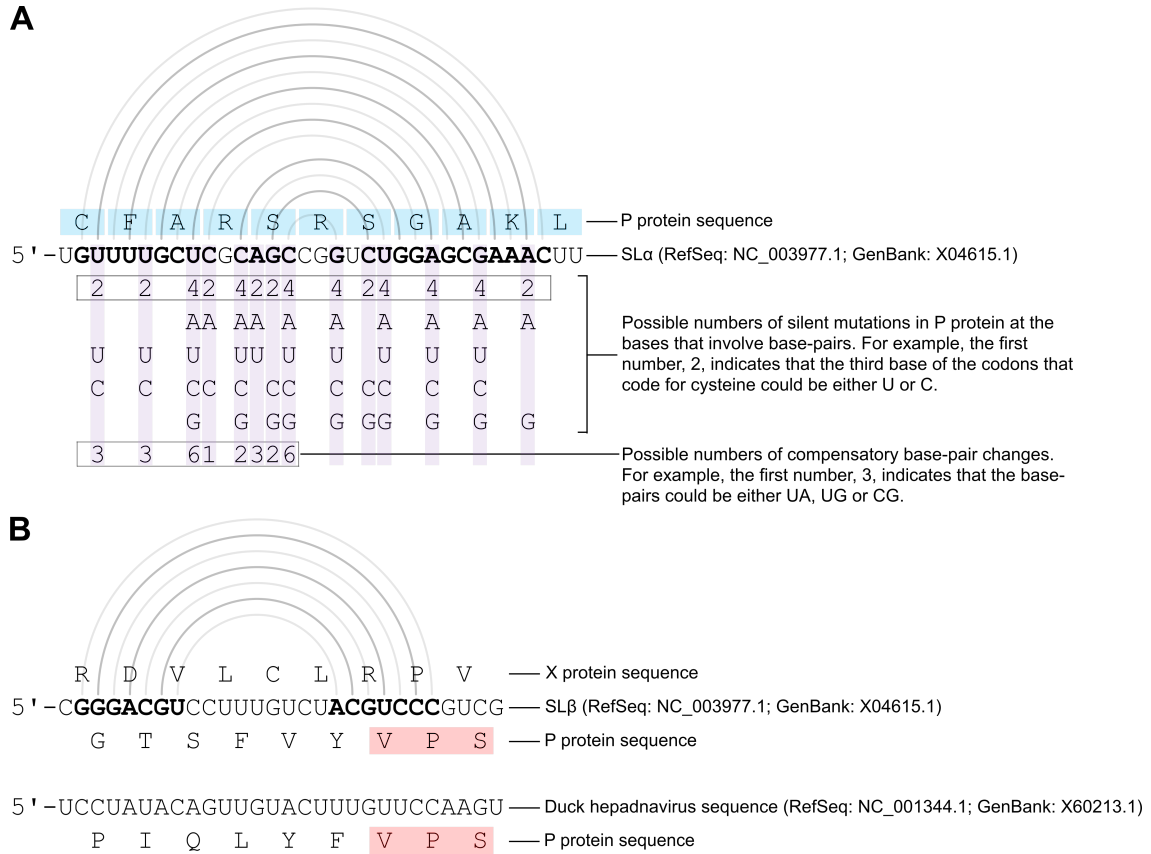

**Figure S1.** The constraints of P and X reading frames on the base-pairs in SLα and SLβ (RefSeq: NC\_003977.1; GenBank: X04615.1). **(A)** SLα is located within the P reading frame (blue shading). There are a total of 3888 possible sequence variants that allow compensatory base-pair changes while preserving the P amino acid sequence ( $3 \times 3 \times 6 \times 1 \times 2 \times 3 \times 2 \times 6 = 3888$ ; purple shading). **(B)** SLβ is located within the overlapping reading frames of P and X proteins. The stem of SLβ would be expected to lack compensatory base-pair changes. The conserved functional motif of RNase H domain of P proteins of mammalian and duck (RefSeq: NC\_001344.1; GenBank: X60213.1) hepadnaviruses is highlighted in pink.<sup>3</sup> Bases that involve in base-pairs are indicated in boldface. Base-pairs are indicated as arcs. It should be noted that on 23 October 2015, NC\_003977.1 (genotype C; GenBank: X04615.1) was replaced with a different HBV genome, NC\_003977.2 (genotype D; GenBank: V01460.1).

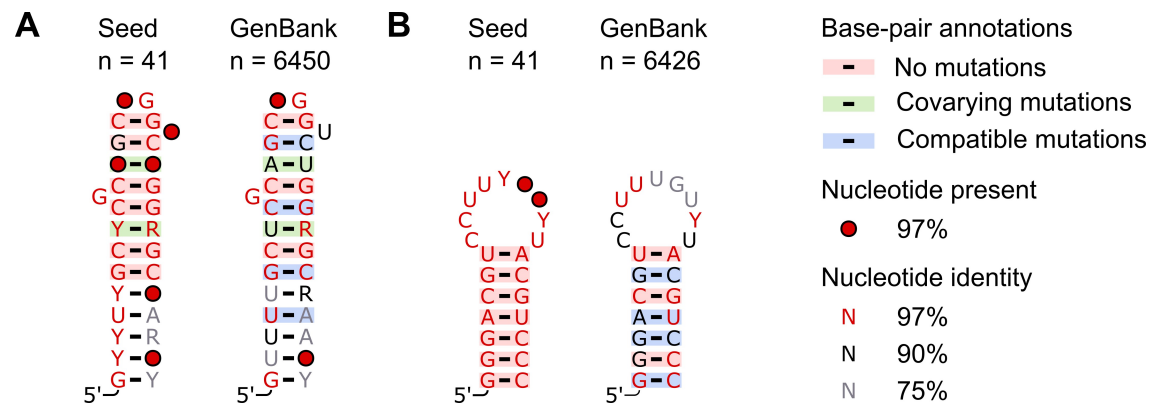

**Figure S2.** RNA consensus diagrams for (A) SL $\alpha$  and (B) SL $\beta$  based on seed sequences (covariance models) or all mammalian hepadnaviruses in GenBank (retrieved at 24 February 2016). Default settings of R2R 1.0.4 were used.

## References

1. Nawrocki EP, Eddy SR. Query-Dependent Banding (QDB) for Faster RNA Similarity Searches. *PLOS Comput Biol* 2007; 3:e56; PMID:17397253;  
<http://dx.doi.org/10.1371/journal.pcbi.0030056>
2. Zhou Y, Lu C, Wu Q-J, Wang Y, Sun Z-T, Deng J-C, Zhang Y. GISSD: Group I Intron Sequence and Structure Database. *Nucl Acids Res* 2008; 36:D31–7; PMID:17942415;  
<http://dx.doi.org/10.1093/nar/gkm766>
3. Chen Y, Marion PL. Amino acids essential for RNase H activity of hepadnaviruses are also required for efficient elongation of minus-strand viral DNA. *J Virol* 1996; 70:6151–6; PMID:8709240
